# Supplementary material for: Culturable bioaerosols along an urban waterfront are primarily associated with coarse particles
Source: PubMed Central journal article supplement (PMC5182991; doi:10.7717/peerj.2827), 2016-12-22
Supplement: peerj-04-2827-s001.pdf [file peerj-04-2827-s001.pdf]

Table 1: Classification of 16S rRNA sequences obtained from isolates of onshore fine (n = 56), onshore coarse (n = 126), offshore coarse (n = 84), and surface water (n = 117) libraries. Classification based on Ribosomal Database Project classifier tool at 95% confidence unless otherwise noted by footnote.

| Phylum                       | Family                      | Genus                     | % of Onshore fine | % of Onshore coarse | % of Offshore coarse | % of Surface water |
|------------------------------|-----------------------------|---------------------------|-------------------|---------------------|----------------------|--------------------|
| <b><i>Proteobacteria</i></b> | <i>Sphingomonadaceae</i>    | <i>Sphingomonas</i>       | 8.93              | 11.9                | 4.76                 | 0.85               |
|                              |                             | <i>Sphingobium</i>        |                   |                     |                      | 5.98 <sup>a</sup>  |
|                              |                             | <i>Novosphingobium</i>    | 3.57              | 0.79                |                      |                    |
|                              |                             | <i>Sphingorhabdus</i>     |                   |                     |                      | 0.85               |
|                              | <i>Pseudomonadaceae</i>     | <i>Pseudomonas</i>        | 5.36              | 2.38                | 5.95                 | 18.8 <sup>b</sup>  |
|                              |                             | unclassified              |                   |                     |                      | 0.85               |
|                              | <i>Oxalobacteraceae</i>     | <i>Massilia</i>           | 1.79              | 8.73                | 7.14                 |                    |
|                              |                             | <i>Noviherbaspirillum</i> | 5.36              | 5.56 <sup>b</sup>   |                      | 0.85               |
|                              |                             | unclassified              |                   | 0.79                |                      |                    |
|                              | <i>Moraxellaceae</i>        | <i>Acinetobacter</i>      | 1.79              | 8.73                | 3.57                 | 5.13               |
|                              |                             | <i>Psychrobacter</i>      |                   |                     |                      | 4.27               |
|                              |                             | <i>Paraperlucidibaca</i>  |                   |                     |                      | 0.85               |
|                              |                             | unclassified              |                   |                     | 1.19                 |                    |
|                              | <i>Campylobacteraceae</i>   | <i>Arcobacter</i>         |                   |                     |                      | 10.26              |
|                              | <i>Comamonadaceae</i>       | <i>Hydrogenophaga</i>     |                   |                     |                      | 1.71               |
|                              |                             | <i>Acidovorax</i>         |                   |                     |                      | 0.85               |
|                              |                             | <i>Simplicispira</i>      |                   |                     |                      | 0.85               |
|                              |                             | <i>Variovorax</i>         |                   | 0.79                |                      |                    |
|                              |                             | unclassified              |                   |                     |                      | 1.71               |
|                              | <i>Caulobacteraceae</i>     | <i>Brevundimonas</i>      | 1.79              | 0.79                | 2.38                 | 0.85               |
|                              |                             | <i>Caulobacter</i>        |                   |                     |                      | 0.85               |
|                              | <i>Acetobacteraceae</i>     | <i>Roseomonas</i>         |                   | 0.79                | 3.57                 |                    |
|                              | <i>Shewanellaceae</i>       | <i>Shewanella</i>         |                   |                     |                      | 3.42               |
|                              | <i>Aeromonadaceae</i>       | <i>Aeromonas</i>          |                   |                     |                      | 2.56               |
|                              | <i>Methylobacteriaceae</i>  | <i>Methylobacterium</i>   | 1.79              | 0.79                |                      |                    |
|                              |                             | <i>Microvirga</i>         | 1.79              |                     |                      |                    |
|                              | <i>Rhizobiaceae</i>         | <i>Rhizobium</i>          |                   |                     |                      | 1.71               |
|                              | <i>Rhodospirillaceae</i>    | <i>Azospirillum</i>       |                   |                     |                      | 0.85               |
|                              |                             | <i>Skermanella</i>        | 1.79              |                     |                      |                    |
|                              | <i>Xanthomonadaceae</i>     | <i>Stenotrophomonas</i>   |                   |                     |                      | 0.85               |
|                              |                             | unclassified              |                   | 0.79                |                      |                    |
|                              | <i>Chromatiaceae</i>        | <i>Rheinheimera</i>       |                   |                     |                      | 0.85               |
| <i>Enterobacteriaceae</i>    | <i>Escherichia/Shigella</i> |                           |                   |                     | 0.85                 |                    |
| <i>Erythrobacteraceae</i>    | <i>Erythrobacter</i>        |                           |                   |                     | 0.85                 |                    |
| <i>Ferrimonadaceae</i>       | unclassified                |                           |                   |                     | 0.85                 |                    |
| <i>Rhodobacteraceae</i>      | unclassified                |                           |                   |                     | 0.85                 |                    |
| <b><i>Actinobacteria</i></b> | <i>Microbacteriaceae</i>    | <i>Microbacterium</i>     | 1.79              | 5.56 <sup>b</sup>   | 13.1                 |                    |

|                      |                              |                           |                   |      |                   |
|----------------------|------------------------------|---------------------------|-------------------|------|-------------------|
|                      |                              | <i>Agrococcus</i>         | 4.76              | 2.38 |                   |
|                      |                              | <i>Curtobacterium</i>     | 1.59              | 2.38 |                   |
|                      |                              | <i>Amnibacterium</i>      | 0.79 <sup>a</sup> |      |                   |
|                      |                              | <i>Cryobacterium</i>      | 0.79              |      |                   |
|                      |                              | <i>Labedella</i>          | 1.79              |      |                   |
|                      |                              | <i>Mycetocola</i>         |                   | 1.19 |                   |
|                      |                              | unclassified              |                   | 1.19 |                   |
|                      | <i>Streptomycetaceae</i>     | <i>Streptomyces</i>       | 21.43             | 7.94 | 14.29             |
|                      | <i>Micrococcaceae</i>        | <i>Arthrobacter</i>       |                   | 4.76 | 5.95              |
|                      |                              | <i>Kocuria</i>            |                   | 2.38 | 3.57              |
|                      |                              | <i>Micrococcus</i>        | 1.79              | 1.59 |                   |
|                      |                              | unclassified              |                   |      | 1.19              |
|                      | <i>Pseudonocardiaceae</i>    | <i>Saccharothrix</i>      | 1.79              | 0.79 |                   |
|                      |                              | <i>Amycolatopsis</i>      | 1.79              |      |                   |
|                      |                              | <i>Lentzea</i>            |                   |      | 1.19 <sup>a</sup> |
|                      |                              | <i>Umezawaea</i>          | 1.79 <sup>a</sup> |      |                   |
|                      |                              | unclassified              |                   |      | 1.19              |
|                      | <i>Nocardioideae</i>         | <i>Nocardioides</i>       | 1.79              | 0.79 | 1.19              |
|                      |                              | <i>Aeromicrobium</i>      | 1.79              |      |                   |
|                      | <i>Cellulomonadaceae</i>     | <i>Cellulomonas</i>       |                   | 0.79 |                   |
|                      |                              | unclassified              | 1.79              |      |                   |
|                      | <i>Intrasporangiaceae</i>    | <i>Terrabacter</i>        | 1.79              | 0.79 |                   |
|                      | <i>Nocardiaceae</i>          | <i>Rhodococcus</i>        | 1.79              | 0.79 |                   |
|                      | <i>Promicromonosporaceae</i> | <i>Cellulosimicrobium</i> |                   | 1.59 |                   |
|                      | <i>Bogoriellaceae</i>        | <i>Georgenia</i>          |                   |      | 1.19              |
|                      | <i>Corynebacteriaceae</i>    | <i>Corynebacterium</i>    |                   |      | 1.19              |
|                      | <i>Dermabacteraceae</i>      | <i>Brachybacterium</i>    |                   |      | 0.85              |
|                      | <i>Dietziaceae</i>           | <i>Dietzia</i>            |                   | 0.79 |                   |
|                      | <i>Geodermatophilaceae</i>   | <i>Modestobacter</i>      |                   | 0.79 |                   |
|                      | <i>Sanguibacteraceae</i>     | <i>Sanguibacter</i>       |                   |      | 0.85              |
| <i>Bacteroidetes</i> | <i>Flavobacteriaceae</i>     | <i>Flavobacterium</i>     |                   |      | 14.53             |
|                      |                              | <i>Chryseobacterium</i>   |                   | 2.38 | 0.85              |
|                      |                              | <i>Cloacibacterium</i>    |                   |      | 0.85              |
|                      |                              | <i>Epilithonimonas</i>    |                   |      | 0.85              |
|                      |                              | unclassified              |                   | 1.19 | 2.56              |
|                      | <i>Cytophagaceae</i>         | <i>Hymenobacter</i>       | 5.36              | 3.17 |                   |
|                      |                              | <i>Adhaeribacter</i>      |                   |      | 1.19              |
|                      |                              | <i>Dyadobacter</i>        |                   | 0.79 |                   |
|                      |                              | <i>Fluviimonas</i>        |                   |      | 0.85              |
|                      |                              | <i>Pontibacter</i>        |                   |      | 1.19              |
|                      |                              | <i>Siphonobacter</i>      |                   | 0.79 |                   |
|                      | <i>Chitinophagaceae</i>      | <i>Flaviumibacter</i>     |                   |      | 0.85              |
|                      |                              | unclassified              |                   | 4.76 |                   |

|                                        |                                      |                         |       |      |      |      |
|----------------------------------------|--------------------------------------|-------------------------|-------|------|------|------|
|                                        | <i>Cyclobacteriaceae</i>             | unclassified            |       |      |      | 4.27 |
|                                        | <i>Sphingobacteriaceae</i>           | <i>Pedobacter</i>       |       |      | 1.19 |      |
| <b><i>Firmicutes</i></b>               | <i>Bacillaceae</i>                   | <i>Bacillus</i>         | 16.07 | 11.9 | 3.57 |      |
|                                        | <i>Carnobacteriaceae</i>             | <i>Trichococcus</i>     |       |      | 1.19 | 1.71 |
|                                        |                                      | <i>Desemzia</i>         |       | 0.79 |      |      |
|                                        | <i>Planococcaceae</i>                | <i>Chryseomicrobium</i> |       |      | 2.38 |      |
|                                        |                                      | <i>Planomicrobium</i>   |       |      |      | 0.85 |
|                                        | <i>Paenibacillaceae</i>              | <i>Brevibacillus</i>    |       |      | 1.19 |      |
|                                        |                                      | <i>Paenibacillus</i>    | 1.79  |      |      |      |
|                                        | <i>Bacillales Incertae Sedis XII</i> | <i>Exiguobacterium</i>  |       | 0.79 |      |      |
| <b><i>Deinococcus-<br/>Thermus</i></b> | <i>Deinococcaceae</i>                | <i>Deinococcus</i>      | 1.79  | 1.59 |      |      |

<sup>a</sup>Indicates that one of the sequences was classified with 85-95% confidence; <sup>b</sup>indicates that two of the sequences were classified with 85-95% confidence. Any sequence with a confidence level less than 85% for classification at the level of genus is listed as 'unclassified' in the table.
