# Supplementary material for: Culturable bioaerosols along an urban waterfront are primarily associated with coarse particles
Source: PeerJ journal article supplement (doi:10.7717/peerj.2827), 2016-12-22
Supplement: Supplemental_Figure_S1.pdf [file Supplemental_Figure_S1.pdf]

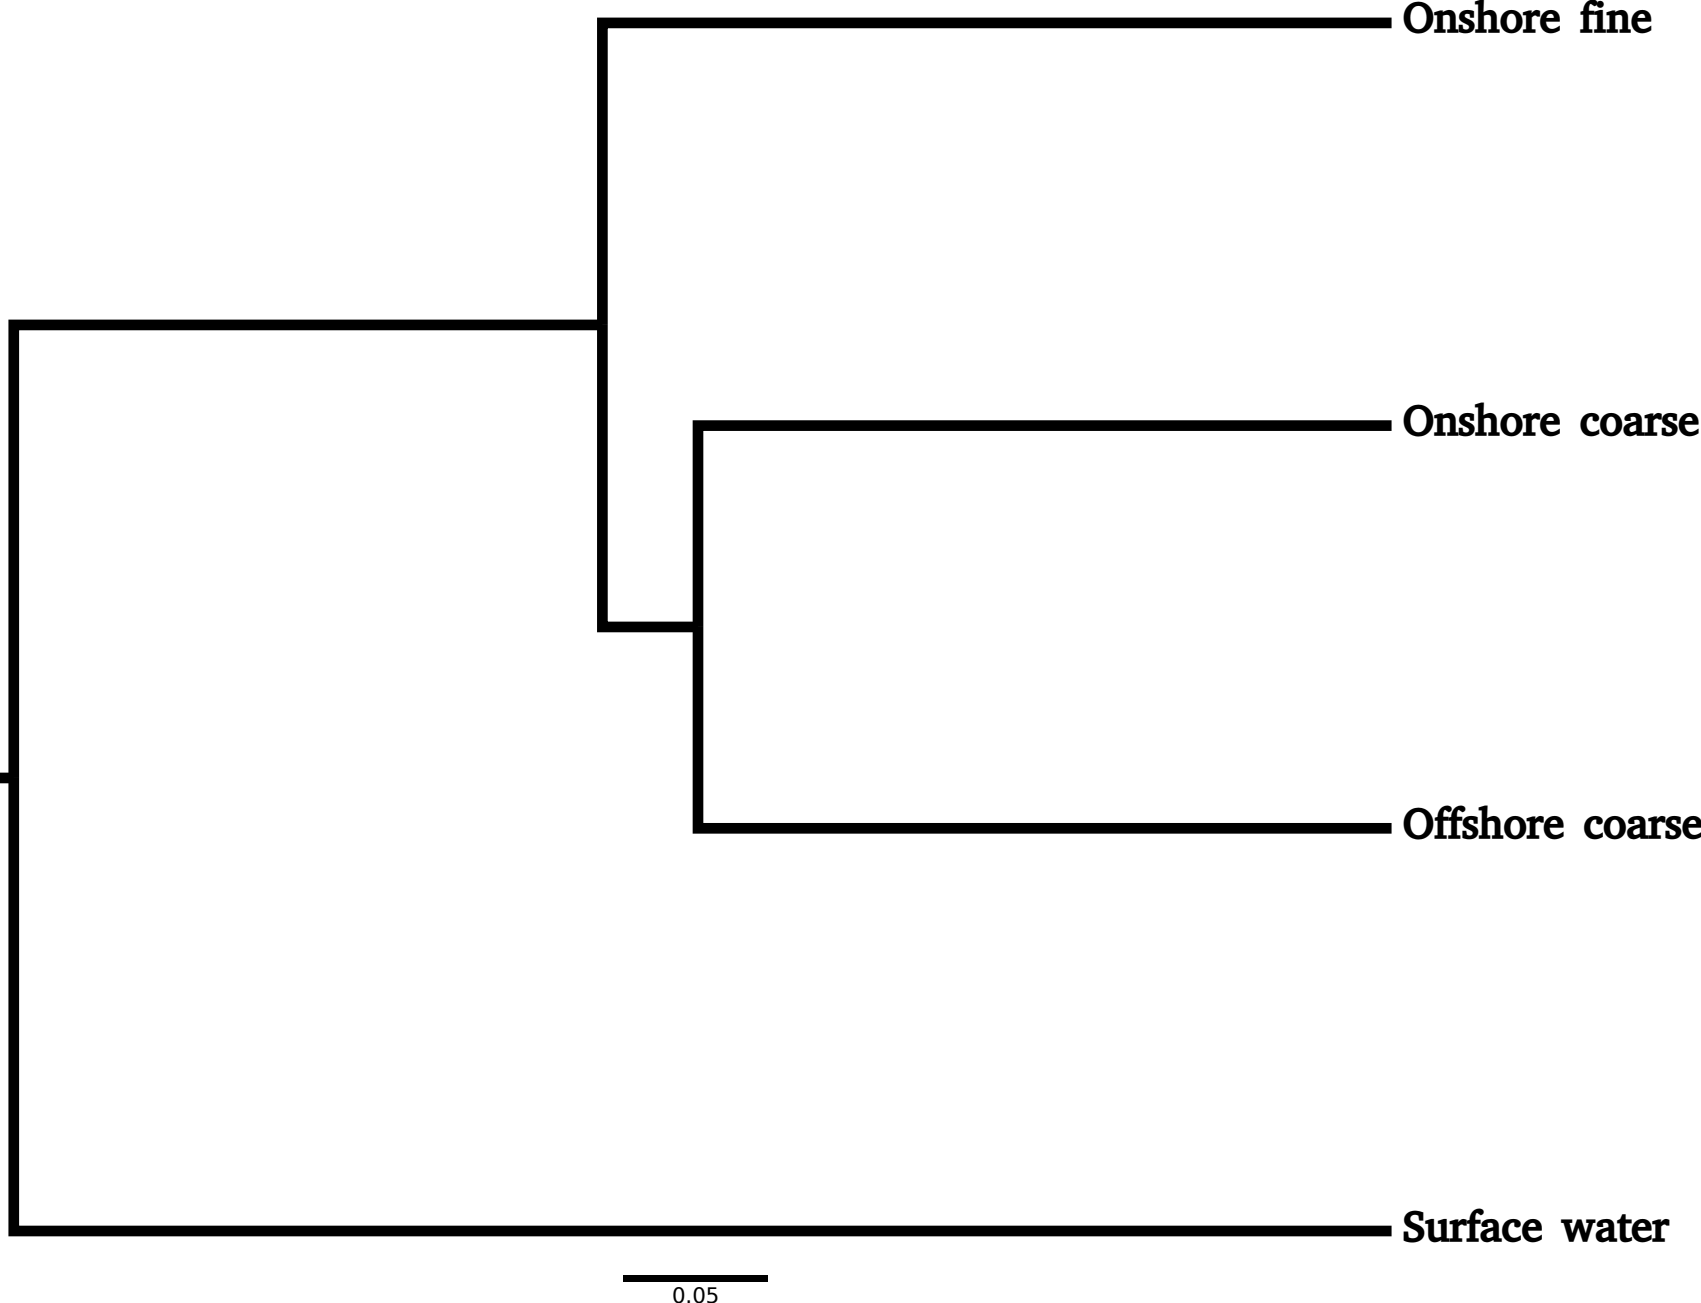

**Onshore fine**

**Onshore coarse**

**Offshore coarse**

**Surface water**

0.05
